# Supplementary material
Source: PubMed Central journal article supplement (PMC8852688)
Supplement: NIHMS1771255-supplement-Supplementary_Information.pdf [file NIHMS1771255-supplement-Supplementary_Information.pdf]

## Supplementary information

---

# Designer DNA nanostructures for viral inhibition

---

In the format provided by the authors and unedited

## Supplementary Information

### Designer DNA nanostructures for viral inhibition

Shaokang Ren<sup>1,2,#</sup>, Keith Fraser<sup>3,#</sup>, Lili Kuo<sup>4,#</sup>, Neha Chauhan<sup>1,2,5</sup>, Addison T. Adrian<sup>1,2,5</sup>, Fuming Zhang<sup>6</sup>, Robert J. Linhardt<sup>3,6,7</sup>, Paul S. Kwon<sup>1</sup> and Xing Wang<sup>1,2,5,8,\*</sup>

<sup>1</sup> Nick Holonyak Jr. Micro and Nanotechnology Laboratory (HMNTL), University of Illinois at Urbana-Champaign, Urbana, IL 61801, USA

<sup>2</sup> Department of Chemistry, University of Illinois at Urbana-Champaign, Urbana, IL 61801, USA

<sup>3</sup> Department of Biological Science, Center for Biotechnology and Interdisciplinary Studies, Rensselaer Polytechnic Institute, Troy, NY 12047, USA

<sup>4</sup> Wadsworth Center, New York State Department of Health, Albany, NY 12201, USA

<sup>5</sup> Centre for Pathogen Diagnostics, DREMES at the University of Illinois at Urbana-Champaign and the Zhejiang University-University of Illinois at Urbana-Champaign Institute, Urbana, IL, USA

<sup>6</sup> Department of Chemical and Biological Engineering, Center for Biotechnology and Interdisciplinary Studies, Rensselaer Polytechnic Institute, Troy, NY 12047, USA

<sup>7</sup> Department of Chemistry and Chemical Biology, Center for Biotechnology and Interdisciplinary Studies, Rensselaer Polytechnic Institute, Troy, NY 12047, USA

<sup>8</sup> Carl R. Woese Institute for Genomic Biology (IGB), University of Illinois at Urbana-Champaign, Urbana, IL 61801, USA

# These authors contributed equally

\*Corresponding author email: [xingw@illinois.edu](mailto:xingw@illinois.edu)

**Supplementary Table 1 | DNA sequences for 5-point DNA star.**

| Strand Name | DNA sequence (5'-3')                                                                                             | Length | Molar equivalents |
|-------------|------------------------------------------------------------------------------------------------------------------|--------|-------------------|
| Scaffold-1  | CTC AGC TGT CGG CAA CAG TCG CCG ATC AGG<br>GCG ACT CAC GAC CAG ACT GTG CTT CCT CTA CCA<br>CCT A                  | 67     | 1                 |
| Scaffold-2  | GAG TCC TGT CGG TCT CAG TCG CCG ATC AGG<br>GCG ACT CGT CTG TCA TGC CGT CTT CCT CTA CCA<br>CCT A                  | 67     | 1                 |
| Scaffold-3  | CCT ACG ATC TCA CGC CAG TCG CCG ATC AGG<br>GCG ACT CCA CAC GAT GCA TGC CTT CCT CTA CCA<br>CCT A                  | 67     | 1                 |
| Scaffold-4  | CTG CAC GAC TGA GGT CAG TCG CCG ATC AGG<br>GCG ACT GGC GTT CGC ATT TGG CTT CCT CTA CCA<br>CCT A                  | 67     | 1                 |
| Scaffold-5  | GCA TCA GGT AGC CAG GAG TCG CCG ATC AGG<br>GCG ACT GCT TCA GCT GAG AGG CTT CCT CTA CCA<br>CCT A                  | 67     | 1                 |
| Edge-1      | GTT GCC GAC AGC TGA GTT TTT TTG AAA TCT TAT<br>ACG CCT CCG GCC ATT GGC TGG CGC AGC GCT<br>CTT TCC TCT ACC ACC TA | 80     | 1                 |
| Edge-2      | AAG CTG TAC ATC GTT TGA GAT GAA GCC TAC GAT<br>ACA TGC CCG TTT TTT TGC ACA GTC TGG TCG TG                        | 65     | 1                 |
| Edge-3      | GAG ACC GAC AGG ACT CTT TTT TTC AGC AGG GCA<br>TGA GTT AGA TCC AAG TCA ACT CAT GCA GAG ACT<br>TCC TCT ACC ACC TA | 80     | 1                 |
| Edge-4      | TTG CTC ACC AGA ACG AGT AGT TCC TAA CGT ACC<br>AAC GCA CGG TTT TTT TGA CGG CAT GAC AGA CG                        | 65     | 1                 |
| Edge-5      | GGC GTG AGA TCG TAG GTT TTT TTT CTG CCC TGA<br>CTT CTA TGC CCG CAT GAA CTA TAG ACT GCG TCT                       | 80     | 1                 |

|         |                                                                                                                  |    |   |
|---------|------------------------------------------------------------------------------------------------------------------|----|---|
|         | TCC TCT ACC ACC TA                                                                                               |    |   |
| Edge-6  | GAG CAC ACT AGC ACA CTC ATC CAG AGG ACA ACT<br>TCC TAC GTA TTT TTT TGG CAT GCA TCG TGT GG                        | 65 | 1 |
| Edge-7  | GAC CTC AGT CGT GCA GTT TTT TTT GGT CGG ATT<br>CTC AAC TCG TCG ATG AAT AAG GCT TGC CCG GTT<br>TCC TCT ACC ACC TA | 80 | 1 |
| Edge-8  | GAT GAA TAA GGC TTG CCC TGT TAA GAT GAA GAT<br>AGG CCA CCC TTT TTT TGC CAA ATG CGA ACG CC                        | 65 | 1 |
| Edge-9  | CCT GGC TAC CTG ATG CTT TTT TTC TCT TTC AAC<br>GGC GTA TTA AGA CGG CTA CAG AGG CTT TGA GGT<br>TCC TCT ACC ACC TA | 80 | 1 |
| Edge-10 | CTA TTT TTG CGG ATG GCT TAG TTC GTC TGC ATG<br>AGT GAT GTC TTT TTT TGC CTC TCA GCT GAA GC                        | 65 | 1 |
| Fix-1   | GAT CTA ACT CAT GCC CTG CTG TTT CGG GCA TGT<br>ATC GTA GGC TTC                                                   | 45 | 1 |
| Fix-2   | GGG CAT AGA AGT CAG GGC AGA TTT CCG TGC GTT<br>GGT ACG TTA GGA                                                   | 45 | 1 |
| Fix-3   | GAC GAG TTG AGA ATC CGA CCA TTT TAC GTA GGA<br>AGT TGT CCT CTG                                                   | 45 | 1 |
| Fix-4   | CTT AAT ACG CCG TTG AAA GAG TTT GGG TGG CCT<br>ATC TTC ATC TTA                                                   | 45 | 1 |
| Fix-5   | GCC GGA GGC GTA TAA GAT TTC TTT GAC ATC ACT<br>CAT GCA GAC GAA                                                   | 45 | 1 |
| Close-1 | ATC TCA AAC GAT GTA CAG CTT TTT TTT TAG AGC<br>GCT GCG CCA GCC AAT G                                             | 49 | 1 |
| Close-2 | ACT ACT CGT TCT GGT GAG CAA TTT TTT TGT CTC<br>TGC ATG AGT TGA CTT G                                             | 49 | 1 |
| Close-3 | GAT GAG TGT GCT AGT GTG CTC TTT TTT TGA CGC<br>AGT CTA TAG TTC ATG C                                             | 49 | 1 |
| Close-4 | ACA GGG CAA GCC TTA TTC ATC TTT TTT TAC CGG                                                                      | 49 | 1 |

|         |                                                                     |    |    |
|---------|---------------------------------------------------------------------|----|----|
|         | GCAAGC CTT ATT CAT C                                                |    |    |
| Close-5 | CTAAGC CAT CCG CAA AAA TAG TTT TTT TCC TCA<br>AAG CCT CTG TAG CCG T | 49 | 1  |
| Aptamer | GCA CCG GGA GGG AGG GAG GGC TTT TTA GGT<br>GGT AGA GGAA             | 40 | 10 |

**Supplementary Table 2 | DNA sequences for 6-point DNA star.**

| Strand Name | DNA sequence (5'-3')                                                                            | Length | Molar equivalents |
|-------------|-------------------------------------------------------------------------------------------------|--------|-------------------|
| Scaffold-1  | CTC AGC TGT CGG CAA CAG TCG CCG ATC AGG<br>GCG ACT CAC GAC CAG ACT GTG CTT CCT CTA CCA<br>CCT A | 67     | 1                 |
| Scaffold-2  | GAG TCC TGT CGG TCT CAG TCG CCG ATC AGG<br>GCG ACT CGT CTG TCA TGC CGT CTT CCT CTA CCA<br>CCT A | 67     | 1                 |
| Scaffold-3  | CCT ACG ATC TCA CGC CAG TCG CCG ATC AGG<br>GCG ACT CCA CAC GAT GCA TGC CTT CCT CTA CCA<br>CCT A | 67     | 1                 |
| Scaffold-4  | CTG CAC GAC TGA GGT CAG TCG CCG ATC AGG<br>GCG ACT GGC GTT CGC ATT TGG CTT CCT CTA CCA<br>CCT A | 67     | 1                 |
| Scaffold-5  | GCA TCA GGT AGC CAG GAG TCG CCG ATC AGG<br>GCG ACT GCT TCA GCT GAG AGG CTT CCT CTA CCA<br>CCT A | 67     | 1                 |
| Scaffold-6  | CTG GCT CGAAA TGC CAG TCG CCG ATC AGG<br>GCG ACT CCA ACC TAA GCC GGA GTT CCT CTA CCA<br>CCT A   | 67     | 1                 |
| Edge-1      | GTT GCC GAC AGC TGA GTT TTT TTG AAA TCT TAT<br>ACG CCT CCG GCC ATT GGC TGG CGC AGC GCT CT       | 65     | 1                 |
| Edge-2      | AAG CTG TAC ATC GTT TGA GAT GAA GCC TAC GAT<br>ACA TGC CCG TTT TTT TGC ACA GTC TGG TCG TG       | 65     | 1                 |
| Edge-3      | GAG ACC GAC AGG ACT CTT TTT TTC AGC AGG GCA<br>TGA GTT AGA TCC AAG TCA ACT CAT GCA GAG AC       | 65     | 1                 |
| Edge-4      | TTG CTC ACC AGA ACG AGT AGT TCC TAA CGT ACC<br>AAC GCA CGG TTT TTT TGA CGG CAT GAC AGA CG       | 65     | 1                 |
| Edge-5      | GGC GTG AGA TCG TAG GTT TTT TTT CTG CCC TGA                                                     | 65     | 1                 |

|         |                                                                                           |    |   |
|---------|-------------------------------------------------------------------------------------------|----|---|
|         | CTT CTA TGC CCG CAT GAA CTA TAG ACT GCG TC                                                |    |   |
| Edge-6  | GAG CAC ACT AGC ACA CTC ATC CAG AGG ACA ACT<br>TCC TAC GTA TTT TTT TGG CAT GCA TCG TGT GG | 65 | 1 |
| Edge-7  | GAC CTC AGT CGT GCA GTT TTT TTT GGT CGG ATT<br>CTC AAC TCG TCG ATG AAT AAG GCT TGC CCG GT | 65 | 1 |
| Edge-8  | GAT GAA TAA GGC TTG CCC TGT TAA GAT GAA GAT<br>AGG CCA CCC TTT TTT TGC CAA ATG CGA ACG CC | 65 | 1 |
| Edge-9  | CCT GGC TAC CTG ATG CTT TTT TTC TCT TTC AAC<br>GGC GTA TTA AGA CGG CTA CAG AGG CTT TGA GG | 65 | 1 |
| Edge-10 | CTA TTT TTG CGG ATG GCT TAG TTC GTC TGC ATG<br>AGT GAT GTC TTT TTT TGC CTC TCA GCT GAA GC | 65 | 1 |
| Edge-11 | GGC ATT TTC GAG CCA GTT TTT TTC GGA TCG TAC<br>TAT GGT TGC CTT AGC ATC GGA ACG AGG GTA AG | 65 | 1 |
| Edge-12 | TCG ACT GTA CCA AGA GCC ATC CTT GAA CCA CCA<br>CAG CTT ACG TTT TTT TCT CCG GCT TAG GTT GG | 65 | 1 |
| Fix-1   | GAT CTA ACT CAT GCC CTG CTG TTT CGG GCA TGT<br>ATC GTA GGC TTC                            | 45 | 1 |
| Fix-2   | GGG CAT AGA AGT CAG GGC AGA TTT CCG TGC GTT<br>GGT ACG TTA GGA                            | 45 | 1 |
| Fix-3   | GAC GAG TTG AGA ATC CGA CCA TTT TAC GTA GGA<br>AGT TGT CCT CTG                            | 45 | 1 |
| Fix-4   | CTT AAT ACG CCG TTG AAA GAG TTT GGG TGG CCT<br>ATC TTC ATC TTA                            | 45 | 1 |
| Fix-5   | AGG CAA CCA TAG TAC GAT CCG TTT GAC ATC ACT<br>CAT GCA GAC GAA                            | 45 | 1 |
| Fix-6   | GCC GGA GGC GTA TAA GAT TTC TTT CGT AAG CTG<br>TGG TGG TTC AAG                            | 45 | 1 |
| Close-1 | ATC TCAAAC GAT GTA CAG CTT TTT TTT TAG AGC<br>GCT GCG CCA GCC AAT G                       | 49 | 1 |
| Close-2 | ACT ACT CGT TCT GGT GAG CAA TTT TTT TGT CTC                                               | 49 | 1 |

|         |                                                                      |    |   |
|---------|----------------------------------------------------------------------|----|---|
|         | TGC ATG AGT TGA CTT G                                                |    |   |
| Close-3 | GAT GAG TGT GCT AGT GTG CTC TTT TTT TGA CGC<br>AGT CTA TAG TTC ATG C | 49 | 1 |
| Close-4 | ACA GGG CAA GCC TTA TTC ATC TTT TTT TAC CGG<br>GCAAGC CTT ATT CAT C  | 49 | 1 |
| Close-5 | CTAAGC CAT CCG CAA AAA TAG TTT TTT TCC TCA<br>AAG CCT CTG TAG CCG T  | 49 | 1 |
| Close-6 | GAT GGC TCT TGG TAC AGT CGA TTT TTT TCT TAC<br>CCT CGT TCC GAT GCT A | 49 | 1 |
| Aptamer | GCA CCG GGA GGG AGG GAG GGC TTT TTA GGT<br>GGT AGA GGAA              | 40 | 6 |



**Supplementary Table 3 | DNA sequences for 7-point DNA star.**

| Strand Name | DNA sequence (5'-3')                                                                            | Length | Molar equivalents |
|-------------|-------------------------------------------------------------------------------------------------|--------|-------------------|
| Scaffold-1  | CTC AGC TGT CGG CAA CAG TCG CCG ATC AGG<br>GCG ACT CAC GAC CAG ACT GTG CTT CCT CTA CCA<br>CCT A | 67     | 1                 |
| Scaffold-2  | GAG TCC TGT CGG TCT CAG TCG CCG ATC AGG<br>GCG ACT CGT CTG TCA TGC CGT CTT CCT CTA CCA<br>CCT A | 67     | 1                 |
| Scaffold-3  | CCT ACG ATC TCA CGC CAG TCG CCG ATC AGG<br>GCG ACT CCA CAC GAT GCA TGC CTT CCT CTA CCA<br>CCT A | 67     | 1                 |
| Scaffold-4  | CTG CAC GAC TGA GGT CAG TCG CCG ATC AGG<br>GCG ACT GGC GTT CGC ATT TGG CTT CCT CTA CCA<br>CCT A | 67     | 1                 |
| Scaffold-5  | GCA TCA GGT AGC CAG GAG TCG CCG ATC AGG<br>GCG ACT GCT TCA GCT GAG AGG CTT CCT CTA CCA<br>CCT A | 67     | 1                 |
| Scaffold-6  | CTG GCT CGAAAA TGC CAG TCG CCG ATC AGG<br>GCG ACT CCA ACC TAA GCC GGA GTT CCT CTA CCA<br>CCT A  | 67     | 1                 |
| Scaffold-7  | CGC TAT GTT CAA GGT CAG TCG CCG ATC AGG<br>GCG ACT CAT CTG ACG TTA CCT GTT CCT CTA CCA<br>CCT A | 67     | 1                 |
| Edge-1      | GTT GCC GAC AGC TGA GTT TTT TTG AAA TCT TAT<br>ACG CCT CCG GCC ATT GGC TGG CGC AGC GCT CT       | 65     | 1                 |
| Edge-2      | AAG CTG TAC ATC GTT TGA GAT GAA GCC TAC GAT<br>ACA TGC CCG TTT TTT TGC ACA GTC TGG TCG TG       | 65     | 1                 |
| Edge-3      | GAG ACC GAC AGG ACT CTT TTT TTC AGC AGG GCA<br>TGA GTT AGA TCC AAG TCA ACT CAT GCA GAG AC       | 65     | 1                 |

|         |                                                                                           |    |   |
|---------|-------------------------------------------------------------------------------------------|----|---|
| Edge-4  | TTG CTC ACC AGA ACG AGT AGT TCC TAA CGT ACC<br>AAC GCA CGG TTT TTT TGA CGG CAT GAC AGA CG | 65 | 1 |
| Edge-5  | GGC GTG AGA TCG TAG GTT TTT TTT CTG CCC TGA<br>CTT CTA TGC CCG CAT GAA CTA TAG ACT GCG TC | 65 | 1 |
| Edge-6  | GAG CAC ACT AGC ACA CTC ATC CAG AGG ACA ACT<br>TCC TAC GTA TTT TTT TGG CAT GCA TCG TGT GG | 65 | 1 |
| Edge-7  | GAC CTC AGT CGT GCA GTT TTT TTT GGT CGG ATT<br>CTC AAC TCG TCG ATG AAT AAG GCT TGC CCG GT | 65 | 1 |
| Edge-8  | GAT GAA TAA GGC TTG CCC TGT TAA GAT GAA GAT<br>AGG CCA CCC TTT TTT TGC CAAATG CGAACG CC   | 65 | 1 |
| Edge-9  | CCT GGC TAC CTG ATG CTT TTT TTC TCT TTC AAC<br>GGC GTA TTAAGA CGG CTA CAG AGG CTT TGA GG  | 65 | 1 |
| Edge-10 | CTA TTT TTG CGG ATG GCT TAG TTC GTC TGC ATG<br>AGT GAT GTC TTT TTT TGC CTC TCA GCT GAA GC | 65 | 1 |
| Edge-11 | GGC ATT TTC GAG CCA GTT TTT TTC GGA TCG TAC<br>TAT GGT TGC CTT AGC ATC GGA ACG AGG GTAAG  | 65 | 1 |
| Edge-12 | TCG ACT GTA CCA AGA GCC ATC CTT GAA CCA CCA<br>CAG CTT ACG TTT TTT TCT CCG GCT TAG GTT GG | 65 | 1 |
| Edge-13 | GAC CTT GAA CAT AGC GTT TTT TTC TGG AGG TGG<br>CAT CCT ACT GTT GCG CCG ACAATG ACAACT AC   | 65 | 1 |
| Edge-14 | CGA TTG TAG CTG AGG CTT GCT AGT ACG GTG TCT<br>GGAAGT TTC TTT TTT TCA GGT AAC GTC AGA TG  | 65 | 1 |
| Fix-1   | GAT CTA ACT CAT GCC CTG CTG TTT CGG GCA TGT<br>ATC GTA GGC TTC                            | 45 | 1 |
| Fix-2   | GGG CAT AGA AGT CAG GGC AGA TTT CCG TGC GTT<br>GGT ACG TTA GGA                            | 45 | 1 |
| Fix-3   | GAC GAG TTG AGA ATC CGA CCA TTT TAC GTA GGA<br>AGT TGT CCT CTG                            | 45 | 1 |
| Fix-4   | CTT AAT ACG CCG TTG AAA GAG TTT GGG TGG CCT<br>ATC TTC ATC TTA                            | 45 | 1 |

|         |                                                                      |    |   |
|---------|----------------------------------------------------------------------|----|---|
| Fix-5   | AGG CAA CCA TAG TAC GAT CCG TTT GAC ATC ACT<br>CAT GCA GAC GAA       | 45 | 1 |
| Fix-6   | ACA GTA GGA TGC CAC CTC CAG TTT CGT AAG CTG<br>TGG TGG TTC AAG       | 45 | 1 |
| Fix-7   | GCC GGA GGC GTA TAA GAT TTC TTT GAA ACT TCC<br>AGA CAC CGT ACT       | 45 | 1 |
| Close-1 | ATC TCAAAC GAT GTA CAG CTT TTT TTT TAG AGC<br>GCT GCG CCA GCC AAT G  | 49 | 1 |
| Close-2 | ACT ACT CGT TCT GGT GAG CAA TTT TTT TGT CTC<br>TGC ATG AGT TGA CTT G | 49 | 1 |
| Close-3 | GAT GAG TGT GCT AGT GTG CTC TTT TTT TGA CGC<br>AGT CTA TAG TTC ATG C | 49 | 1 |
| Close-4 | ACA GGG CAA GCC TTA TTC ATC TTT TTT TAC CGG<br>GCAAGC CTT ATT CAT C  | 49 | 1 |
| Close-5 | CTA AGC CAT CCG CAA AAA TAG TTT TTT TCC TCA<br>AAG CCT CTG TAG CCG T | 49 | 1 |
| Close-6 | GAT GGC TCT TGG TAC AGT CGA TTT TTT TCT TAC<br>CCT CGT TCC GAT GCT A | 49 | 1 |
| Close-7 | AGC AAG CCT CAG CTA CAA TCG TTT TTT TGT AGT<br>TGT CAT TGT CGG CGC A | 49 | 1 |
| Aptamer | GCA CCG GGA GGG AGG GAG GGC TTT TTA GGT<br>GGT AGA GGAA              | 40 | 7 |

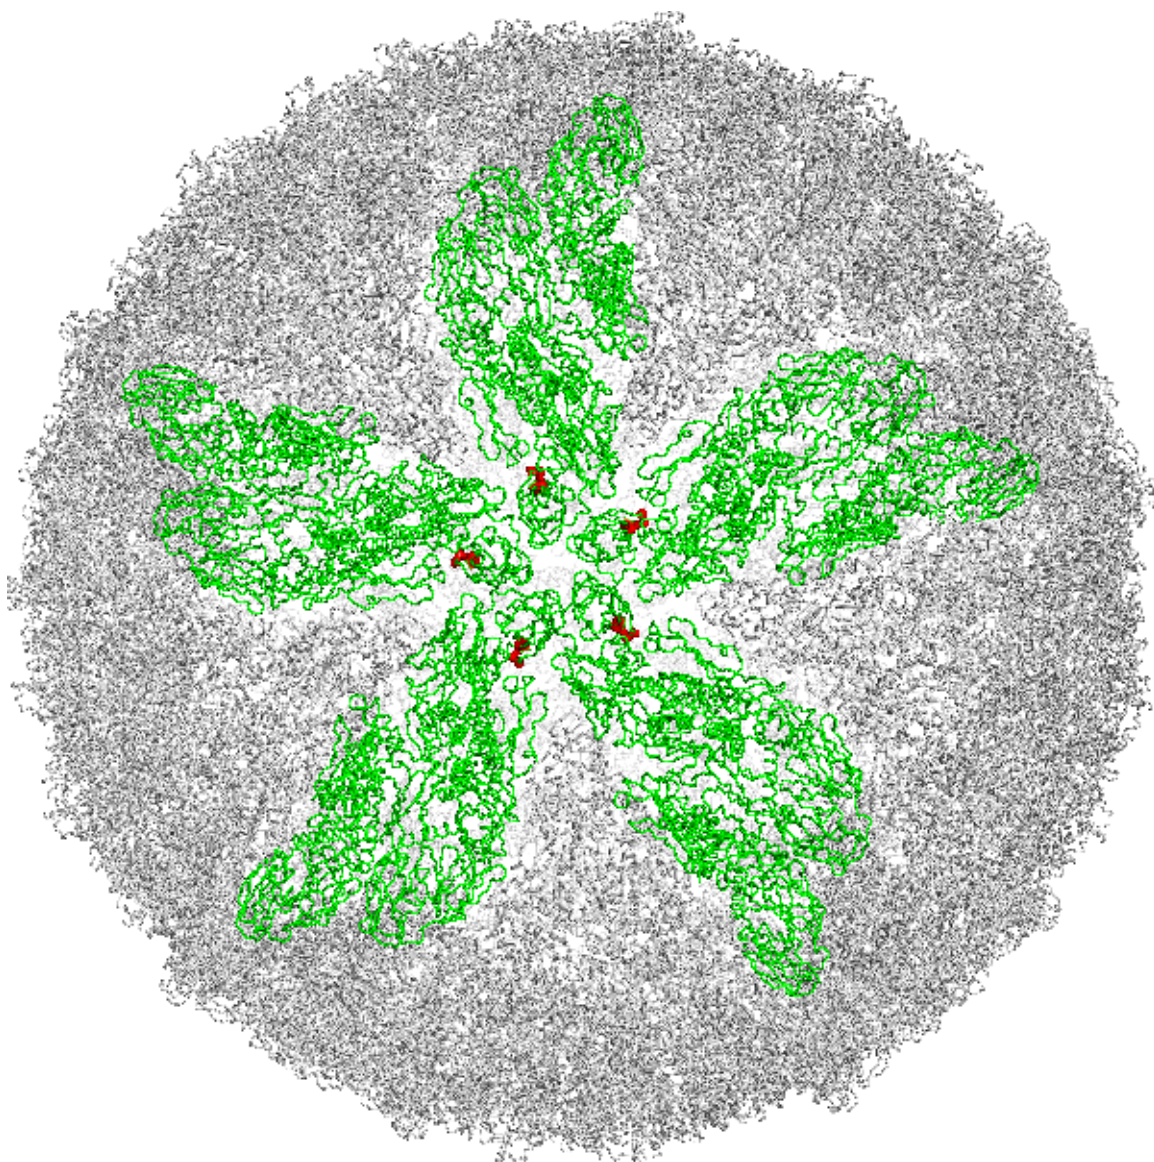

**Supplementary Figure 1 | Illustration of the distribution of E proteins in the dengue viral particle.** The particle consists of 12 of the represented 5-point star structures (green) with each leaf/node on the star representative of three monomers of the E protein (for illustrative purposes only one of these is shown). The QHGTI sequence motif (red) that functions as the antigen binding site is present in domain III of the E protein and is displayed in a defined geometric pattern that repeats across the surface of the viral particle.



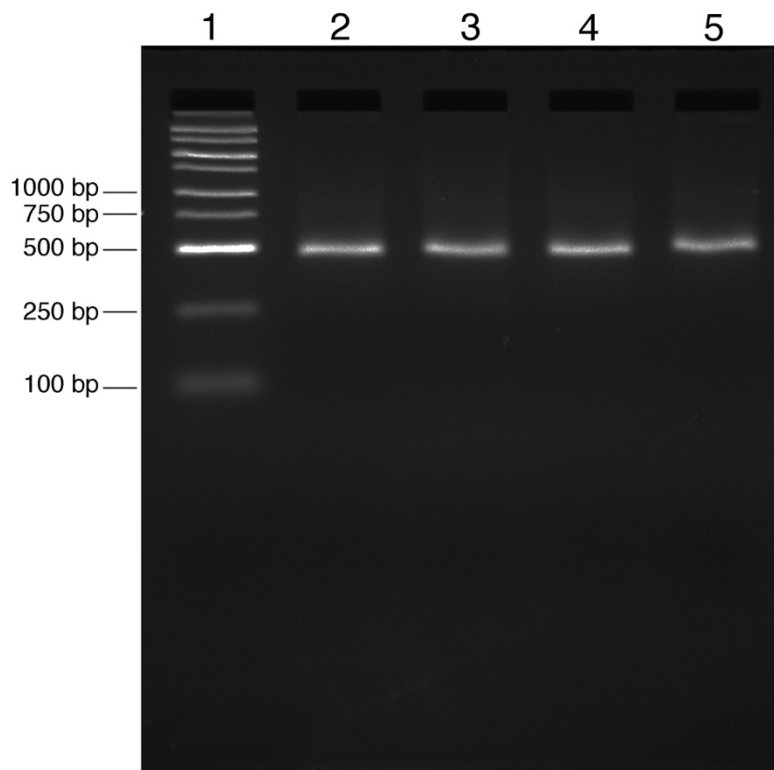

**Supplementary Figure 3 | DNA star stability through freeze-thaw cycles.** DNA star complex before and after one, two or three freeze-thaw cycles (-20 °C to 23 °C) were characterized on a 3% AGE. Lane-1: DNA ladder; Lane-2: DNA star (before freeze-thaw cycle); Lane-3: DNA star (after one freeze-thaw cycle); Lane-4: DNA star (after two freeze-thaw cycles); Lane-5: DNA star (after three freeze-thaw cycles).

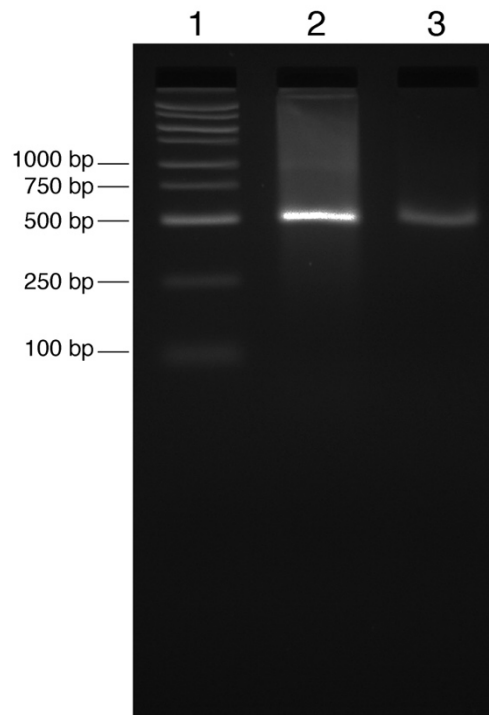

**Supplementary Figure 4 | Purification of DNA star complex using AGE.** DNA star complex before and after gel purification. Lane-1: DNA ladder; Lane-2: DNA star (before gel purification); Lane-3: DNA star (after gel purification).
